# Supplementary material
Source: PubMed Central journal article supplement (PMC7484420)
Supplement: NIHMS1617392-supplement-Supplementary__Figure.pdf [file NIHMS1617392-supplement-Supplementary__Figure.pdf]

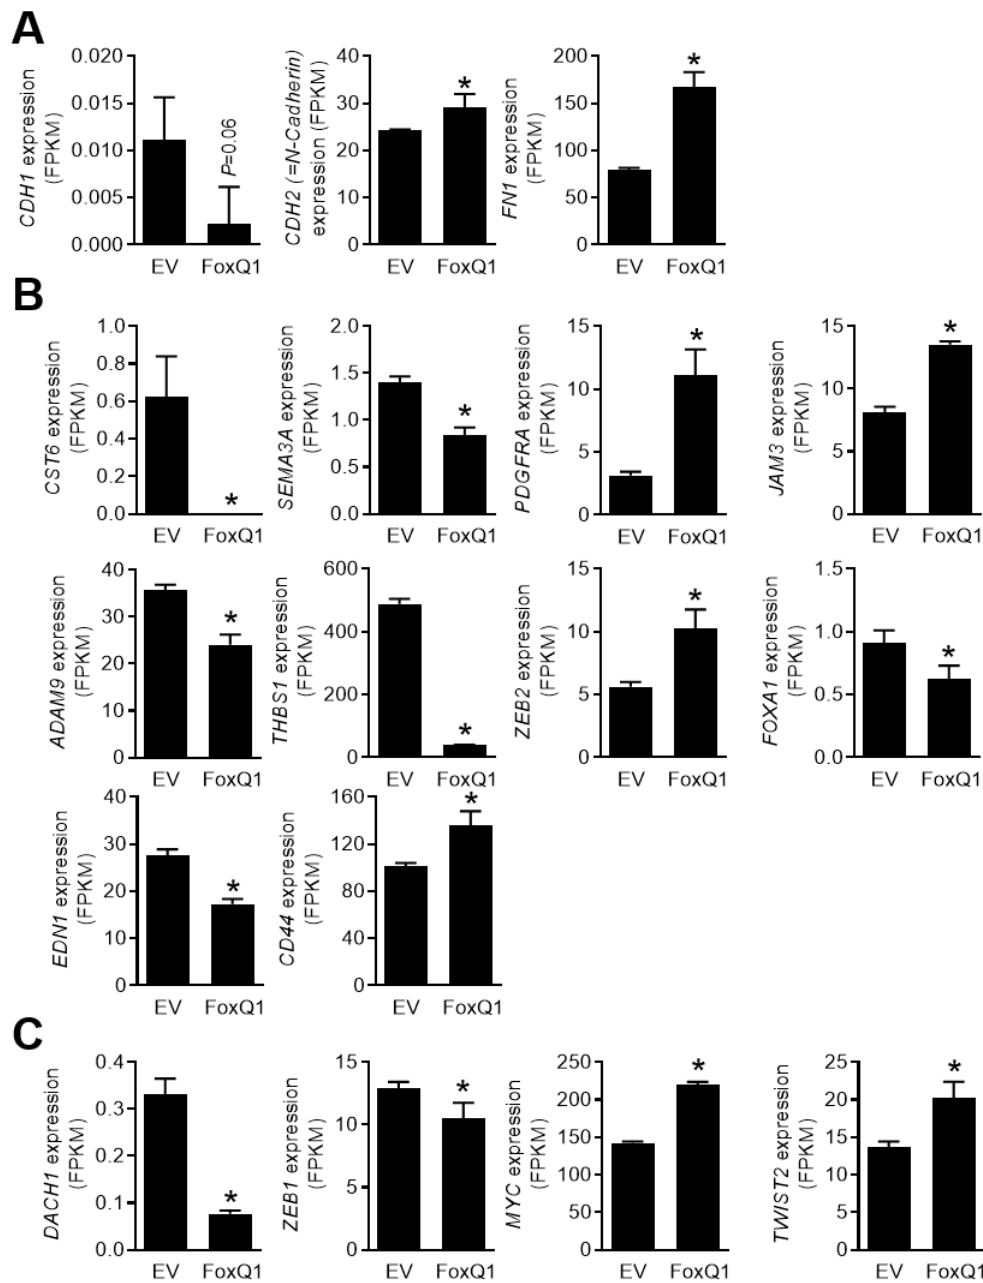

**Figure S1:** Consistent data from RNA-seq analysis (present study) and published literature (7,9,10) on known targets of FoxQ1. **(A)** RNA-seq analysis of genes associated with epithelial-mesenchymal transition (7). *CDH1*, *E-cadherin*; *CDH2*, *N-cadherin*; *FN1*, *fibronectin 1*. **(B)** RNA-seq analysis of genes involved in breast cancer stemness and chemoresistance (9). *CST6*, *cystatin 6*; *SEMA3A*, *semaphorin 3A*; *PDGFRA*, *platelet-derived growth factor receptor alpha*; *JAM3*, *junctional adhesion molecule 3*; *ADAM9*, *ADAM metalloproteinase domain 9*; *THBS1*, *thrombospondin 1*; *ZEB2*, *zinc finger E-box binding homeobox 2*; *FOXA1*, *forkhead box A1*; *EDN1*, *endothelin 1*. **(C)** RNA-seq analysis of genes related to breast cancer stemness (10). *DACH1*, *dachshund homolog 1*; *ZEB1*, *zinc finger E-box binding homeobox 1*; *TWIST2*, *twist basic helix-loop-helix transcription factor 2*. Results shown are mean  $\pm$  S.D. ( $n = 3$ ). \* $P < 0.05$  by two-sided Student's t-test.

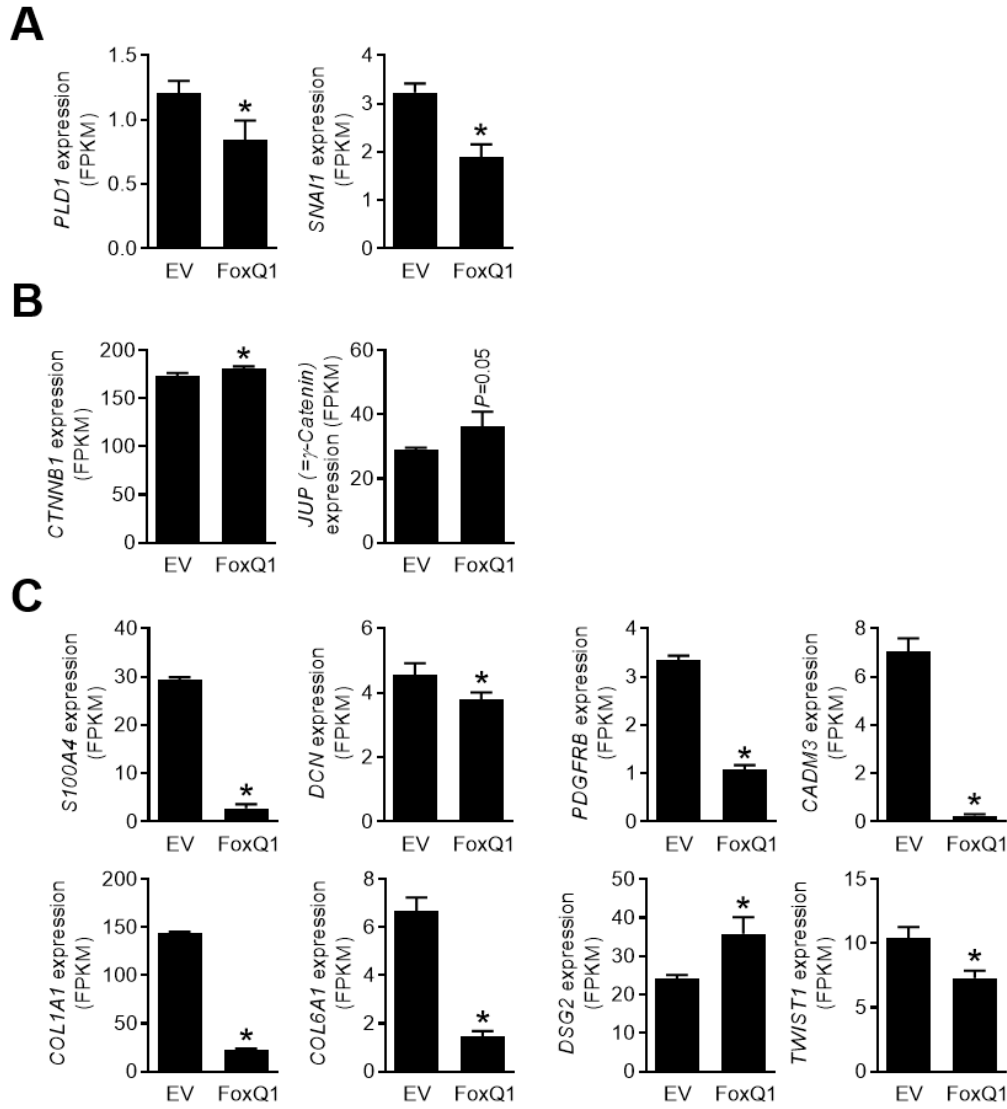

**Figure S2:** Inconsistent data between RNA-seq analysis (present study) and published literature (7,9,14). (A-C) RNA-seq analysis of genes not consistent with the published literatures (7,9,14). Results shown are mean  $\pm$  S.D. ( $n = 3$ ). \* $P < 0.05$  by two-sided Student's t-test. *PLD1*, phospholipase D1; *SNAI1*, snail family transcriptional repressor 1; *CTNMB1*, catenin beta 1; *S100A4*, S100 calcium binding protein A4; *DCN*, decorin; *PDGFRB*, platelet-derived growth factor receptor beta; *CADM3*, cell adhesion molecule 3; *COL1A1*, collagen type I alpha 1; *COL6A1*, collagen Type VI alpha 1; *DSG2*, desmoglein 2; *TWIST1*, twist basic helix-loop-helix transcription factor 1.

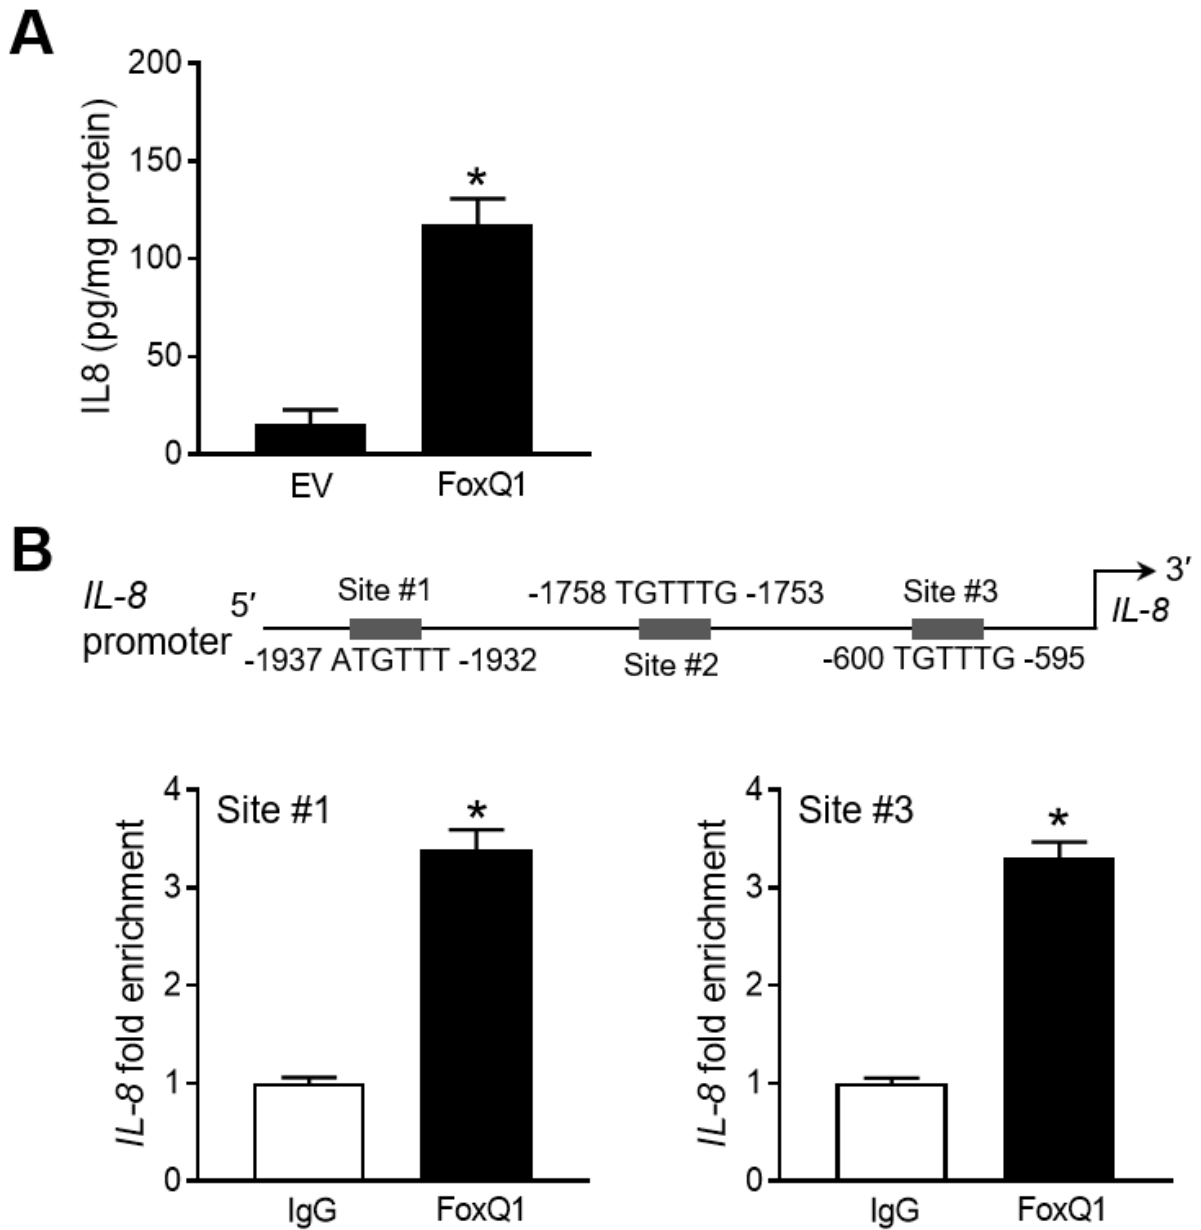

**Figure S3:** FoxQ1 regulated *IL-8* expression in MCF-7 cells. **(A)** Quantification of *IL-8* secretion in the media of EV and FoxQ1 overexpressing MCF-7 cells. Data shown are mean  $\pm$  S.D. ( $n = 3$ ). \* $P < 0.05$  by two-sided Student's  $t$  test. **(B)** ChIP assay for FoxQ1 recruitment at the promoter region of *IL-8* in MCF-7 cells. The results shown are mean  $\pm$  S.D. ( $n = 3$ ). \* $P < 0.05$  by two-sided Student's  $t$ -test. Experiments were done twice with similar results.
