# Supplementary material
Source: PubMed Central journal article supplement (PMC7484420)
Supplement: NIHMS1617392-supplement-Supplementary_Tables.pdf [file NIHMS1617392-supplement-Supplementary_Tables.pdf]

**Table S1.** The summary of mapping results.

| Sample name      | EV-SUM159            |                    | FoxQ1-SUM159         |                    |
|------------------|----------------------|--------------------|----------------------|--------------------|
|                  | Mean                 | SD                 | Mean                 | SD                 |
| Total reads      | 65198263             | 4386610            | 72027681             | 10214885           |
| Total mapped     | 58914439<br>(90.38%) | 3655237<br>(0.51%) | 64895915<br>(90.17%) | 8672753<br>(0.82%) |
| Multiple mapped  | 1147142<br>(1.76%)   | 81213<br>(0.01%)   | 1224173<br>(1.70%)*  | 154648<br>(0.03%)* |
| Uniquely mapped  | 57767297<br>(88.62%) | 3574643<br>(0.52%) | 63671741<br>(88.46%) | 8518408<br>(0.80%) |
| Reads map to '+' | 28883648<br>(44.31%) | 1787322<br>(0.26%) | 31835871<br>(44.23%) | 4259204<br>(0.40%) |
| Reads map to '-' | 28883648<br>(44.31%) | 1787322<br>(0.26%) | 31835871<br>(44.23%) | 4259204<br>(0.40%) |
| Non-splice reads | 32843918<br>(50.39%) | 2036952<br>(0.30%) | 36497716<br>(50.68%) | 5119388<br>(0.56%) |
| Splice reads     | 24923378<br>(38.24%) | 1546835<br>(0.33%) | 27174025<br>(37.79%) | 3464790<br>(1.14%) |

\*, Statistically significant by unpaired Student's t test ( $P < 0.05$ ).

**Table S2.** Correlation between *FoxQ1* and genes associated with “Cellular response to stress” category from TCGA-BrCa (n=1097) and RNA-seq results. Student *t* test was used for statistical analysis.

| <i>Correlation</i> | <i>Genes</i>                   | TCGA-BrCa analysis |                | RNA-Seq data                  |                |
|--------------------|--------------------------------|--------------------|----------------|-------------------------------|----------------|
|                    |                                | Pearson r          | <i>P</i> value | fold change<br>(FoxQ1 vs. EV) | <i>P</i> value |
| <i>Positive</i>    | <i>TUBB6</i>                   | 0.4657             | < 0.0001       | + 1.59                        | 0.0032         |
|                    | <i>HMGA2</i>                   | 0.3699             | < 0.0001       | + 1.56                        | 0.0541         |
|                    | <i>CDK6</i>                    | 0.3684             | < 0.0001       | + 1.29                        | 0.0978         |
|                    | <i>MAP4K4</i>                  | 0.3093             | < 0.0001       | + 1.65                        | 0.0001         |
|                    | <i>SOD2</i>                    | 0.2869             | < 0.0001       | + 2.18                        | < 0.0001       |
|                    | <i>IL8 (=CXCL8)</i>            | 0.2812             | < 0.0001       | + 2.42                        | 0.0001         |
|                    | <i>IL1A</i>                    | 0.2779             | < 0.0001       | + 23.04                       | 0.0002         |
|                    | <i>ETS2</i>                    | 0.2657             | < 0.0001       | + 1.53                        | 0.0047         |
|                    | <i>C11orf73<br/>(=HIKESHI)</i> | 0.2568             | < 0.0001       | + 1.37                        | 0.0512         |
|                    | <i>PHC2</i>                    | 0.2453             | < 0.0001       | + 1.49                        | 0.0001         |
|                    | <i>IGFBP7</i>                  | 0.2410             | < 0.0001       | + 4.04                        | 0.0015         |
|                    | <i>ETS1</i>                    | 0.2288             | < 0.0001       | + 1.23                        | 0.0341         |
|                    | <i>HMGA1</i>                   | 0.2181             | < 0.0001       | + 1.22                        | 0.0233         |
|                    | <i>JUN</i>                     | 0.1691             | < 0.0001       | + 1.14                        | 0.0265         |
|                    | <i>TFDP2</i>                   | 0.1550             | < 0.0001       | + 1.74                        | 0.0007         |
|                    | <i>AR</i>                      | -0.2917            | < 0.0001       | - 9.71                        | < 0.0001       |
|                    | <i>MAP2K4</i>                  | -0.1899            | < 0.0001       | - 1.56                        | 0.0003         |
|                    | <i>BM11</i>                    | -0.1888            | < 0.0001       | - 1.24                        | 0.0048         |
|                    | <i>DYNLL2</i>                  | -0.1810            | < 0.0001       | - 1.32                        | 0.0017         |
|                    | <i>HSPA1L</i>                  | -0.1789            | < 0.0001       | - 3.45                        | 0.0019         |
|                    | <i>ATP7A</i>                   | -0.1738            | < 0.0001       | - 1.24                        | 0.0500         |
|                    | <i>CBX4</i>                    | -0.1715            | < 0.0001       | - 2.02                        | < 0.0001       |
|                    | <i>DYNC1LI1</i>                | -0.1714            | < 0.0001       | - 1.23                        | 0.0025         |
|                    | <i>MAPK3</i>                   | -0.1645            | < 0.0001       | - 1.79                        | 0.0042         |
|                    | <i>UBN1</i>                    | -0.1638            | < 0.0001       | - 1.14                        | 0.0049         |
|                    | <i>GSR</i>                     | -0.1506            | < 0.0001       | - 1.39                        | 0.0095         |
| <i>Negative</i>    | <i>BAG2</i>                    | 0.3692             | < 0.0001       | - 1.21                        | 0.0004         |
|                    | <i>CA9</i>                     | 0.3279             | < 0.0001       | - 11.51                       | 0.0119         |
|                    | <i>WTIP</i>                    | 0.3160             | < 0.0001       | - 2.46                        | 0.0017         |
|                    | <i>CBX2</i>                    | 0.2512             | < 0.0001       | - 3.05                        | < 0.0001       |
|                    | <i>CCNE1</i>                   | 0.2497             | < 0.0001       | - 1.31                        | 0.0304         |
|                    | <i>PSMB9</i>                   | 0.2361             | < 0.0001       | - 1.34                        | 0.0600         |
|                    | <i>RPS6KA3</i>                 | 0.2278             | < 0.0001       | - 1.77                        | 0.0004         |
|                    | <i>PSMB2</i>                   | 0.2273             | < 0.0001       | - 1.25                        | 0.0431         |
|                    | <i>EGLN3</i>                   | 0.2229             | < 0.0001       | - 2.25                        | 0.0010         |
|                    | <i>MAPK7</i>                   | 0.2111             | < 0.0001       | - 1.79                        | < 0.0001       |

|                       |         |          |         |          |
|-----------------------|---------|----------|---------|----------|
| <i>TUBA1A</i>         | 0.2091  | < 0.0001 | - 1.88  | 0.0015   |
| <i>E2F3</i>           | 0.2000  | < 0.0001 | - 1.32  | 0.0109   |
| <i>UBE2D1</i>         | 0.1940  | < 0.0001 | - 1.29  | 0.0022   |
| <i>PSMB10</i>         | 0.1877  | < 0.0001 | - 1.79  | 0.0020   |
| <i>DNAJC2</i>         | 0.1778  | < 0.0001 | - 1.27  | 0.0011   |
| <i>HIF1A</i>          | 0.1683  | < 0.0001 | - 1.38  | 0.0018   |
| <i>PSMC1</i>          | 0.1678  | < 0.0001 | - 1.49  | 0.0086   |
| <i>IL6</i>            | 0.1650  | < 0.0001 | - 2.55  | < 0.0001 |
| <i>TUBB2A</i>         | 0.1633  | < 0.0001 | - 1.39  | 0.0089   |
| <i>UBE2C</i>          | 0.1511  | < 0.0001 | - 1.32  | 0.0047   |
| <i>ERO1L (=ERO1A)</i> | 0.1509  | < 0.0001 | - 1.21  | 0.0711   |
| <i>DCTN4</i>          | -0.2692 | < 0.0001 | + 1.15  | 0.0035   |
| <i>MDM2</i>           | -0.2195 | < 0.0001 | + 1.26  | 0.0478   |
| <i>HIST4H4</i>        | -0.2000 | < 0.0001 | + 3.34  | 0.0083   |
| <i>H2AFJ</i>          | -0.1580 | < 0.0001 | + 2.30  | 0.0119   |
| <i>NUP210</i>         | -0.1561 | < 0.0001 | + 14.72 | < 0.0001 |
| <i>H2AFV</i>          | -0.1501 | < 0.0001 | + 1.16  | 0.0022   |

---
